# Supplementary material for: ZnO nanorods and nanowalls directly synthesized on flexible substrates with block copolymer templates
Source: Royal Society of Chemistry journal article supplement (doi:10.1039/c4tc02331e), 2015-01-01
Supplement: c4tc02331e1.pdf [file c4tc02331e1.pdf]

## Supplementary Information

### **ZnO Nanorods and Nanowalls Directly Synthesized on Flexible Substrates with Block Copolymer Templates**

Jin-Hyung Kim, Sung-Soo Kim, and Byeong-Hyeok Sohn\*

Department of Chemistry, Seoul National University, Seoul 151-747, Korea

**\*Corresponding Author:** Tel: +82-2-883-2154; Fax: +82-2-889-1568

E-mail: [bhsohn@snu.ac.kr](mailto:bhsohn@snu.ac.kr)

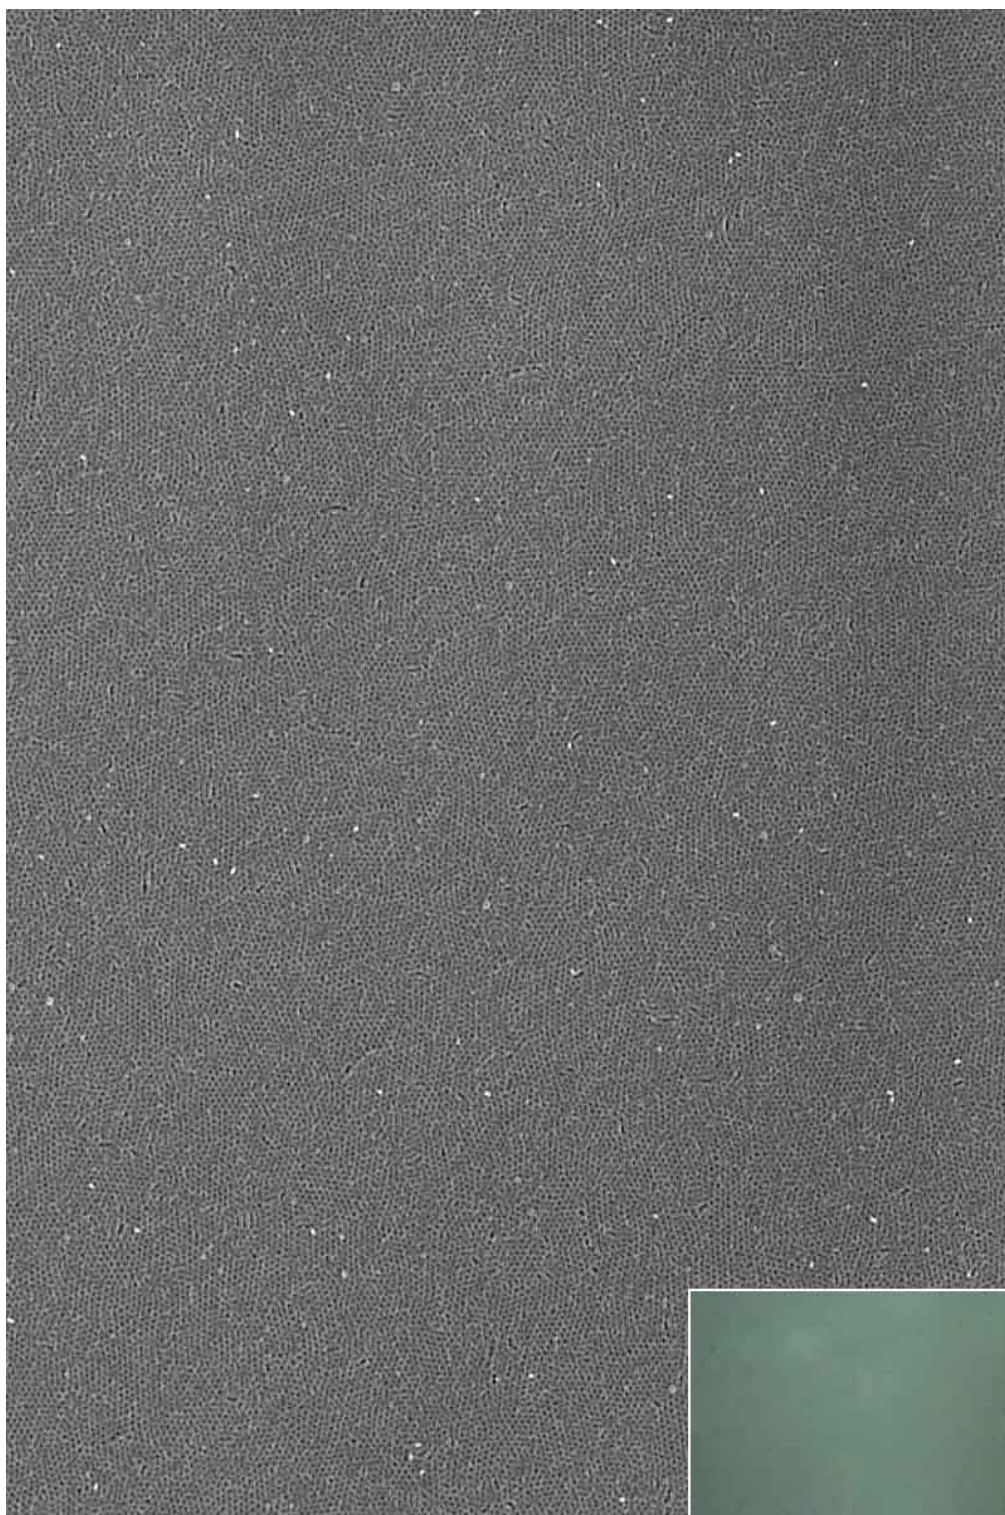

**Figure S1.** FE-SEM image ( $8\ \mu\text{m} \times 12\ \mu\text{m}$ ) of a nanoporous template with cylindrical nanopores from PS(64)-PMMA(35) on a flexible substrate. An optical microscope image ( $350\ \mu\text{m} \times 250\ \mu\text{m}$ ) is also inserted.

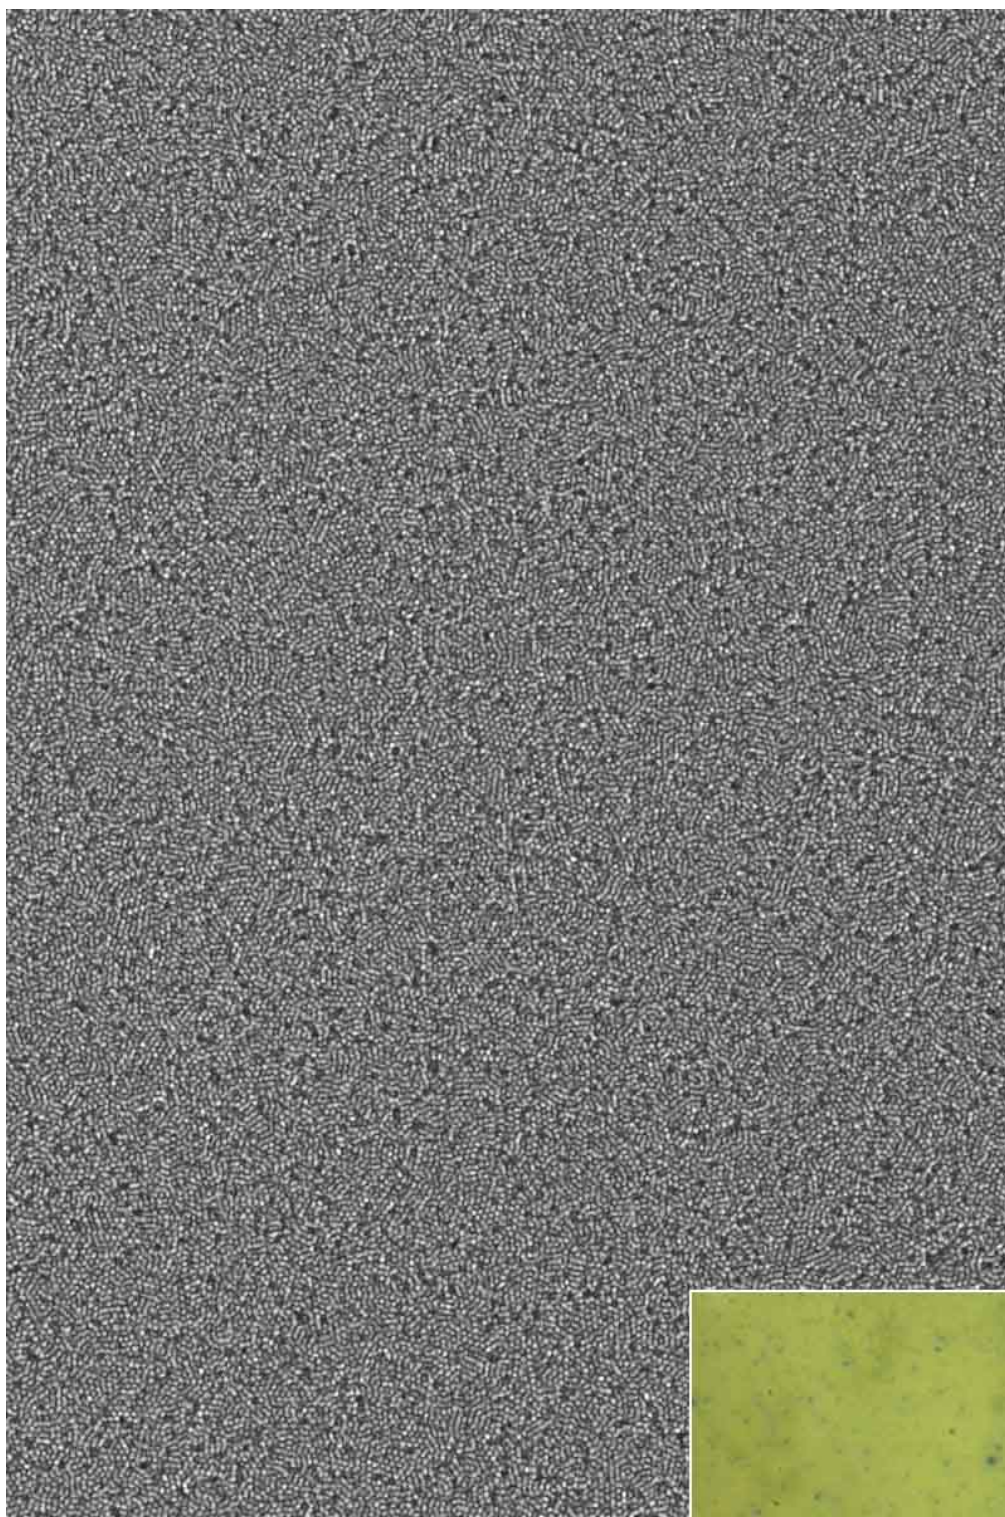

**Figure S2.** FE-SEM image ( $8\ \mu\text{m} \times 12\ \mu\text{m}$ ) of ZnO nanorods on a flexible substrate from the template shown in Figure S1. An optical microscope image ( $350\ \mu\text{m} \times 250\ \mu\text{m}$ ) is also inserted.

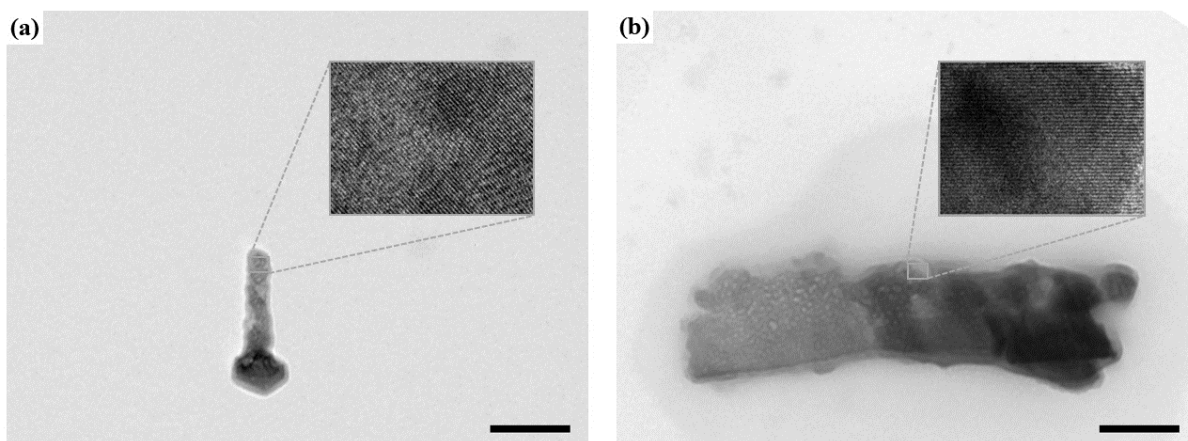

**Figure S3.** TEM images: (a) ZnO nanorod; (b) ZnO nanowall. The scale bars are 100 nm.

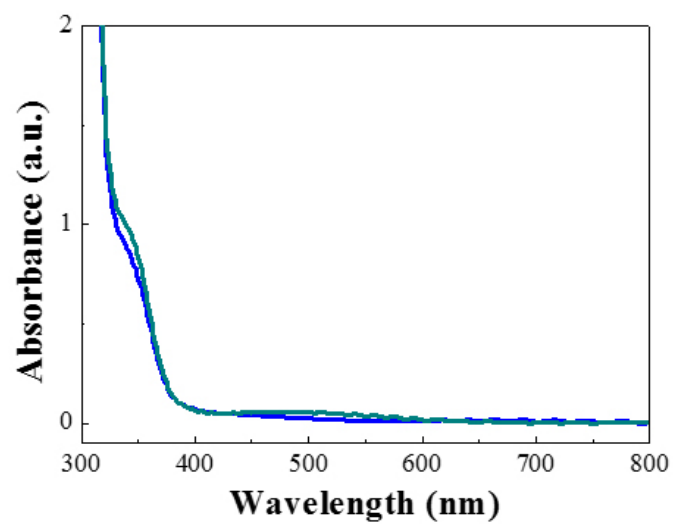

**Figure S4.** UV-Vis spectra of ZnO nanorods (blue) and ZnO nanowalls (green) on a flexible substrate. Absorptions below 320 nm are associated with the PET substrate.
